# Supplementary material for: Lung Inflammation Predictors in Combined Immune Checkpoint-Inhibitor and Radiation Therapy—Proof-of-Concept Animal Study
Source: MDPI journal article supplement (doi:10.3390/biomedicines10051173), 2022-05-19
Supplement: s1 [file s1]

**Table S1.** All CBC, blood cytokines, CD45, CT, and MRI radiomics used in the regression modeling.

| <b>Inflammation</b> | <b>CT<br/>Average<br/>Gray Value</b> | <b>CT<br/>Average Gray<br/>Value</b> | <b>CT<br/>Kurtosis 2D</b> | <b>CT<br/>Co-Occurrence<br/>Matrix Entropy</b> | <b>NLR</b> | <b>MR<br/>Kurtosis 2D</b> | <b>CD45</b> |
|---------------------|--------------------------------------|--------------------------------------|---------------------------|------------------------------------------------|------------|---------------------------|-------------|
| <b>high</b>         | 14.53                                | 290.10                               | 3.43                      | 12.47                                          | 0.55       | 2.11                      | 0.33        |
| <b>high</b>         | 12.68                                | 292.25                               | 3.09                      | 12.46                                          | 0.67       | 2.33                      | 0.27        |
| <b>high</b>         | 10.62                                | 298.10                               | 4.44                      | 12.39                                          | 0.49       | 6.78                      | 0.22        |
| <b>high</b>         | 12.58                                | 288.15                               | 2.23                      | 12.44                                          | 0.40       | 2.82                      | 0.28        |
| <b>high</b>         | 14.49                                | 309.88                               | 2.16                      | 12.18                                          | 0.46       | 5.48                      | 0.41        |
| <b>high</b>         | 9.74                                 | 292.85                               | 6.58                      | 12.26                                          | 0.65       | 3.90                      | 0.35        |
| <b>high</b>         | 8.54                                 | 292.06                               | 2.39                      | 12.23                                          | 0.66       | 2.61                      | 0.36        |
| <b>high</b>         | 10.52                                | 255.93                               | 5.78                      | 12.24                                          | 0.53       | 3.72                      | 0.24        |
| <b>high</b>         | 8.54                                 | 287.96                               | 2.31                      | 11.91                                          | 0.86       | 7.37                      | 0.20        |
| <b>low</b>          | 8.62                                 | 273.94                               | 1.89                      | 12.03                                          | 0.70       | 5.79                      | 0.20        |
| <b>low</b>          | 10.08                                | 273.04                               | 2.82                      | 12.28                                          | 0.87       | 1.76                      | 0.16        |
| <b>low</b>          | 8.54                                 | 265.14                               | 2.38                      | 12.00                                          | 0.59       | 1.78                      | 0.14        |
| <b>low</b>          | 9.01                                 | 277.42                               | 3.02                      | 12.21                                          | 0.64       | 7.56                      | 0.09        |
| <b>low</b>          | 8.54                                 | 291.22                               | 2.89                      | 12.26                                          | 0.64       | 10.37                     | 0.19        |
| <b>low</b>          | 8.54                                 | 279.77                               | 2.71                      | 12.26                                          | 0.54       | 8.09                      | 0.21        |
| <b>low</b>          | 14.53                                | 290.10                               | 3.43                      | 12.47                                          | 0.55       | 2.11                      | 0.33        |

**Table S2.** The model values of the parameters utilizing the CT imaging features in the binary logistic regression.

| <b>Parameter</b>         | <b>Model Value</b> |
|--------------------------|--------------------|
| GM-CSF                   | 0.86               |
| CT Average Gray Value    | 0.86               |
| CT Kurtosis 2D           | 0.09               |
| CT Co- Occurrence Matrix | 147.27             |
| NLR                      | 26.59              |
| Constant                 | -2077.89           |

**Table S3.** The model values of the parameters utilizing the MRI imaging features in the binary logistic regression.

| <b>Parameter</b> | <b>Model Value</b> |
|------------------|--------------------|
| GM-CSF           | 1.85               |
| MR Kurtosis 2D   | -3.03              |
| NLR              | -37.42             |
| Constant         | 21.13              |
